# Supplementary material for: Marzano's Self-System Thinking and a Four-Factor Model of Academic Self-Determination as Predictors of Persistence in Natural Sciences and Scientific Text Reading Fluency Among Bilingual University Students
Source: Research Square preprint supplement (doi:10.21203/rs.3.rs-6992595/v1), 2025-10-31
Supplement: Supplementary file 1 [file 253d324c50d045826e729ffa.docx]

**Appendix 4**

**Reading Fluency and Comprehension Test (Scientific Texts)**

**Purpose:** This test assesses reading fluency (speed and accuracy) and comprehension of scientific texts.

**Materials:**

- This test document (printed).
- A stopwatch or timer.
- A pencil or pen.
- A recording device to record the student reading.

**Instructions for the Administrator:**

1. **Preparation:** Print this test document. Ensure the student has a quiet environment, free from distractions. Provide a pencil or pen.
2. **Introduction:** Say to the student: "Today, you will be reading three short passages about science. I want you to read each passage aloud as quickly and accurately as possible. I will time you for one minute on each passage. After you read each passage, you will answer a few questions to see how well you understood what you read. Do you have any questions before we begin?"
3. **Timing:**
   - Start the timer as soon as the student begins reading.
   - Allow the student to read for exactly 1 minute.
   - At the end of 1 minute, say "STOP." Mark the last word the student read on the passage.
4. **Marking Errors:** As the student reads, carefully mark any errors. Use the following codes:
   - **Omission:** Circle the word that was omitted.
   - **Substitution:** Write the substituted word *above* the original word.
   - **Insertion:** Indicate with a caret (^) where the word was inserted.
   - **Mispronunciation:** Write a phonetic spelling (or a close approximation) above the word.
   - **Hesitation:** Mark a brief pause with a single slash ( / ) and a longer pause with a double slash ( // ). If the hesitation significantly impacts fluency (e.g., the student struggles to decode the word), it can also be counted as an error.
5. **Comprehension Questions:** After the student reads for 1 minute and you have marked the last word read, remove the passage and hand them the comprehension questions. Allow the student to answer the comprehension questions.
6. **Repeat:** Repeat steps 3-5 for each of the three passages.
7. **Scoring:** Follow the scoring instructions below.

**Instructions for the Student:**

"You will read three passages about science. Read each passage aloud as quickly and accurately as you can for one minute. Try your best. After you finish reading each passage, you will answer some questions about what you read. Do your best."

**Passage 1: Physics Text - Understanding the Concept of Force in Classical Mechanics**

In physics, force (F) is defined as any interaction that, when unopposed, changes the motion of an object. According to Newton’s Second Law of Motion, force is directly proportional to the acceleration (a) of an object and is represented mathematically as:

F = m ⋅ a

where m is the mass of the object. This equation implies that a greater force is required to accelerate a more massive object to the same degree as a lighter object.

One important force in mechanics is gravitational force (F₉), which attracts two bodies toward each other. This force can be calculated with the formula:

F₉ = (G ⋅ m₁ ⋅ m₂) / r²

where:

- G is the gravitational constant, approximately 6.674 × 10⁻¹¹ Nm²/kg²,
- m₁ and m₂ are the masses of the two objects,
- r is the distance between the centers of the two masses.

Another fundamental force is frictional force (f), which opposes the relative motion of two surfaces in contact. Friction can be static or kinetic, with static friction (fₛ) keeping an object at rest, while kinetic friction (fₖ) slows down moving objects. The magnitude of kinetic friction can be calculated as:

fₖ = μₖ ⋅ N

where:

- μₖ is the coefficient of kinetic friction,
- N is the normal force, which is the perpendicular force exerted by a surface on an object resting on it.

**Comprehension Questions for Passage 1:**

1. According to Newton's Second Law, what two factors determine the force acting on an object?
2. What is the name given to the force that attracts two objects toward one another?
3. Explain the difference between static and kinetic friction.
4. What does "r" stand for in the formula of gravitational force?

**Passage 2: Chemistry Text - Chemical Equilibrium and Reaction Rates**

In chemistry, chemical equilibrium is a state in which the concentrations of reactants and products remain constant over time in a closed system. This equilibrium occurs when the rate of the forward reaction equals the rate of the reverse reaction. Consider a simple reaction:

aA + bB ⇌ cC + dD

where A and B are reactants, C and D are products, and a, b, c, and d represent their respective stoichiometric coefficients. At equilibrium, the reaction can be described by the equilibrium constant Kc, which is expressed as:

Kc = [C]^c ⋅ [D]^d / [A]^a ⋅ [B]^b

Here, [C], [D], [A], and [B] denote the molar concentrations of the substances. A high Kc value indicates a reaction that favors the formation of products, while a low Kc value suggests that reactants are favored.

The speed of reaching equilibrium depends on the reaction rate (r), which can be affected by various factors. According to the rate law, the rate of a reaction is proportional to the concentrations of the reactants raised to a power, often represented as:

r = k ⋅ [A]^m ⋅ [B]^n

where:

- k is the rate constant, unique to each reaction and dependent on temperature,
- m and n are the reaction orders for each reactant, determined experimentally.

The Arrhenius equation provides insight into how temperature (T) affects the rate constant k:
k = A ⋅ e^(-Ea / RT)

where:

- A is the pre-exponential factor,
- Ea is the activation energy of the reaction,
- R is the gas constant (8.314 J/mol·K),
- T is the temperature in Kelvin.

Understanding these principles allows chemists to control reactions, optimize yields, and predict the behavior of substances under different conditions.

**Comprehension Questions for Passage 2:**

1. What is chemical equilibrium?
2. What does a high value for Kc indicate about a reaction?
3. What is the rate constant (k) in the rate law equation dependent on?
4. What do "A", and "Ea" stand for in the Arrhenius equation?

**Passage 3: Biology Text - The Process of Cellular Respiration**

In biology, cellular respiration is the metabolic process by which cells convert biochemical energy from nutrients into adenosine triphosphate (ATP), releasing waste products. Cellular respiration consists of several stages: glycolysis, the citric acid cycle, and oxidative phosphorylation.

The first stage, glycolysis, occurs in the cytoplasm and breaks down one molecule of glucose (C₆H₁₂O₆) into two molecules of pyruvate (C₃H₄O₃). This process produces a net gain of two ATP molecules and two molecules of nicotinamide adenine dinucleotide (NADH), an electron carrier. The reaction can be summarized as:

C₆H₁₂O₆ + 2NAD⁺ + 2ADP + 2Pᵢ → 2C₃H₄O₃ + 2NADH + 2ATP + 2H₂O

In the presence of oxygen, pyruvate enters the mitochondria where it undergoes the citric acid cycle (also known as the Krebs cycle). This cycle generates additional NADH and another carrier, flavin adenine dinucleotide (FADH₂). The process yields ATP and releases carbon dioxide (CO₂) as a waste product.

The final stage, oxidative phosphorylation, occurs along the electron transport chain in the inner mitochondrial membrane. Here, NADH and FADH₂ donate electrons, which travel through protein complexes and drive the production of ATP by ATP synthase. Oxygen (O₂) acts as the final electron acceptor, combining with electrons and protons (H⁺) to form water (H₂O). The overall reaction for cellular respiration can be summarized as:

C₆H₁₂O₆ + 6O₂ → 6CO₂ + 6H₂O + ATP

Through this efficient energy conversion, cellular respiration provides cells with the ATP necessary for various biological processes, from muscle contraction to molecular synthesis. Understanding these stages is crucial for grasping how cells harness energy to sustain life.

**Comprehension Questions for Passage 3:**

1. What is the purpose of cellular respiration?
2. Where does glycolysis occur within the cell?
3. What role does oxygen play in oxidative phosphorylation?
4. What are the three stages of cellular respiration?

**Scoring Instructions:**

**1. Fluency Score (Words Correct Per Minute - WCPM):**

- **Count the total number of words read** by the student in one minute.
- **Count the number of errors** (omissions, substitutions, insertions, mispronunciations). Hesitations that significantly disrupt the flow should also be counted.
- **Calculate WCPM:** Total Words Read - Number of Errors = WCPM

**2. Comprehension Score:**

- Award 1 point for each correct comprehension question.
- Total possible score for each passage: 4 points.

**3. Analysis:**

- **Fluency:** Compare the student's WCPM to grade-level benchmarks. Consider the types of errors made. Frequent mispronunciations may indicate decoding weaknesses, while frequent omissions or insertions might suggest a lack of attention to detail.
- **Comprehension:** Analyze the student's answers to identify specific areas of difficulty. Were they unable to extract factual information? Did they struggle with understanding complex relationships or processes?

**Record Sheet:**

| Passage | Total Words Read | Errors | WCPM | Comprehension Score ( /4) |
| --- | --- | --- | --- | --- |
| Physics |  |  |  |  |
| Chemistry |  |  |  |  |
| Biology |  |  |  |  |

**Notes/Observations:** (Record any relevant observations about the student's reading behavior, such as hesitations, struggles with specific vocabulary, or signs of frustration.)

**Reading Fluency and Comprehension Test Scoring Rubric**

**I. Fluency (Words Correct Per Minute - WCPM)**

| Level | Description | Errors | WCPM (Example Range - Adjust for Grade Level & Text Complexity) |
| --- | --- | --- | --- |
| **Excellent** | Reads smoothly and effortlessly with appropriate pacing and intonation. Demonstrates strong decoding skills and minimal hesitations. Clearly understands the text while reading. | Very few errors (0-2). Primarily self-corrected mispronunciations or minor hesitations that do not disrupt the flow. | 150+ WCPM (This is a high estimate; adjust based on the student's grade level and the difficulty of the text.) |
| **Good** | Reads with generally good pacing and intonation, though some minor hesitations or stumbles may be present. Demonstrates adequate decoding skills. Comprehension appears generally strong. | Few errors (3-5). May include occasional mispronunciations, substitutions, or omissions. Hesitations are infrequent and do not significantly impede understanding. | 120-149 WCPM |
| **Fair** | Reads with uneven pacing and frequent hesitations or stumbles. Decoding skills are inconsistent. May struggle with some vocabulary. Comprehension may be affected. | Moderate errors (6-10). Includes multiple mispronunciations, substitutions, or omissions. Hesitations are more frequent and may disrupt the flow of reading. | 90-119 WCPM |
| **Poor** | Reads slowly and laboriously, with significant hesitations, stumbles, and mispronunciations. Demonstrates weak decoding skills. Struggles significantly with vocabulary. Comprehension is significantly impaired. | Many errors (11+). Includes numerous mispronunciations, substitutions, or omissions. Frequent hesitations and long pauses disrupt the flow significantly. | Below 90 WCPM |

**Notes for Fluency Scoring:**

- **Self-Corrections:** Do *not* count self-corrections as errors *unless* the self-correction takes an excessive amount of time and significantly interrupts the flow.
- **Dialect/Accent:** Be mindful of dialectal variations and accents. Do not penalize a student for pronunciations that are consistent with their dialect if the word is clearly understood.
- **Repeated Errors:** If a student consistently mispronounces the same word, count it as only *one* error. However, note the repeated error in the "Notes/Observations" section, as it may indicate a specific phonics or decoding weakness.
- **Hesitations:** Brief pauses ( / ) are generally not counted as errors unless they are excessive or interfere with the overall flow. Longer pauses ( // ) or noticeable struggles with word decoding *should* be counted as errors.

**II. Comprehension (Per Passage)**

| Level | Description | Score |
| --- | --- | --- |
| **Excellent** | Provides accurate and complete answers to all comprehension questions, demonstrating a thorough understanding of the main ideas and supporting details of the passage. | 4 Points |
| **Good** | Provides mostly accurate answers to the comprehension questions, demonstrating a good understanding of the main ideas and most supporting details. May have minor omissions or inaccuracies. | 3 Points |
| **Fair** | Provides partially accurate answers to some of the comprehension questions, demonstrating a basic understanding of some main ideas but struggling with supporting details or complex relationships. May have significant omissions or inaccuracies. | 2 Points |
| **Poor** | Provides inaccurate or incomplete answers to most or all of the comprehension questions, demonstrating a limited understanding of the main ideas and details of the passage. Significant misconceptions may be present. | 1 Point |
| **No Response** | Provides no answer to any comprehension question. Demonstrating no understanding of the passage. | 0 Points |

**Notes for Comprehension Scoring:**

- **Focus on Understanding:** Evaluate whether the student *understands* the concept, even if the answer is not worded perfectly.
- **Partial Credit:** Award partial credit if the answer is partially correct or demonstrates some understanding of the concept.
- **Inference:** Some questions may require students to make inferences based on the text. Evaluate whether the inference is logical and supported by the text.
- **Rephrasing:** Allow for rephrasing of answers, as long as the meaning is conveyed accurately.

**III. Overall Interpretation & Recommendations**

After scoring both fluency and comprehension for all passages, consider the following:

- **Pattern of Performance:** Are there specific patterns in the student's performance? For example, does the student struggle more with vocabulary than with decoding? Is comprehension stronger in one subject area than another?
- **Qualitative Observations:** Refer to your notes and observations. Did the student appear frustrated or engaged? Did they demonstrate any specific reading strategies?
- **Instructional Implications:** What are the implications for instruction? What specific skills or strategies need to be addressed?
