# Supplementary material for: Marzano's Self-System Thinking and a Four-Factor Model of Academic Self-Determination as Predictors of Persistence in Natural Sciences and Scientific Text Reading Fluency Among Bilingual University Students
Source: Research Square preprint supplement (doi:10.21203/rs.3.rs-6992595/v1), 2025-10-31
Supplement: Supplementary file 2 [file 4dc08ea6d3490266445e664d.docx]

**Appendix** **3**

**Persistence in Learning Natural Sciences (PLNS) Scale**

Scale Instructions:

Dear Student,

This scale has been developed to assess your level of persistence in learning natural sciences. Please follow these guidelines:

- Enter your personal details in the space provided.
- Read each statement carefully, then shade the box in front of the response that best represents you, as shown in the example below:

- One of my family members reminds me of my academic assignments:
 Strongly agree  Agree  Sometimes  Disagree  Strongly disagree

- Mark only one response for each statement, as in the example above.
- Do not leave any item unanswered.
- Choose the response that best reflects you; any answer is considered correct as long as it represents you.
- Your responses on this scale will not affect your grades or academic performance evaluation.
- Begin answering the scale items when you are instructed to do so.

Personal Data

| Gender: …………………………………….…………………….. | Student Name: …………………………………………………….. |
| --- | --- |
| Date of Birth: ………………………………………………….. | University and College: ……………………………………… |
|  | Level/Section: **………………………………………………………..** |

**Dimension 1: Eagerness of effort.**

**Score: ……………….**

| 1- | I make sure to stop what I'm doing to follow my lessons in natural science courses from the very beginning. | Strongly agree | agree | Sometimes | Disagree | Strongly |
| --- | --- | --- | --- | --- | --- | --- |
| 2- | I work hard to achieve my academic goals for the scientific courses I study. | Strongly agree | agree | Sometimes | Disagree | Strongly |
| 3- | I focus on laboratory tasks, no matter how long it takes to complete them. | Strongly agree | agree | Sometimes | Disagree | Strongly |

**Dimension 2: Work hardened.**

**Score: ……………….**

| 1- | I persistently work on the complex scientific problems I encounter until I solve them. | Strongly agree | agree | Sometimes | Disagree | Strongly |
| --- | --- | --- | --- | --- | --- | --- |
| 2- | I repeatedly try to study the scientific topics that are challenging for me until I master them. | Strongly agree | agree | Sometimes | Disagree | Strongly |
| 3- | I consider myself a hardworking and persistent person in my scientific studies | Strongly agree | agree | Sometimes | Disagree | Strongly |

**Dimension 3: Ambitious**

**Score: ……………….**

| 1- | When I pursue my goals in the natural sciences, nothing else distracts me, no matter what it is. | Strongly agree | agree | Sometimes | Disagree | Strongly |
| --- | --- | --- | --- | --- | --- | --- |
| 2- | I am willing to do whatever it takes to achieve excellence in my studies in my specialized field of natural sciences. | Strongly agree | agree | Sometimes | Disagree | Strongly |
| 3- | I give up my favorite recreational activities in pursuit of success in learning the sciences. | Strongly agree | agree | Sometimes | Disagree | Strongly |
| 4- | My personal and family activities encroach on the time I devote to completing my academic assignments in natural sciences. (R) | Strongly agree | agree | Sometimes | Disagree | Strongly |

**Dimension 4: Perfectionist**

**Score: ……………….**

| 1- | I complete the scientific tasks I begin at an outstanding level. | Strongly agree | agree | Sometimes | Disagree | Strongly |
| --- | --- | --- | --- | --- | --- | --- |
| 2- | I perform laboratory task procedures with care in order to obtain accurate scientific data. | Strongly agree | agree | Sometimes | Disagree | Strongly |
| 3- | My colleagues describe me as someone who does not leave the required scientific topics and issues until I have fully grasped them. | Strongly agree | agree | Sometimes | Disagree | Strongly |
| 4- | My colleagues describe me as someone who exaggerates in being precise with data and scientific procedures. | Strongly agree | agree | Sometimes | Disagree | Strongly |
