# Supplementary material for: Marzano's Self-System Thinking and a Four-Factor Model of Academic Self-Determination as Predictors of Persistence in Natural Sciences and Scientific Text Reading Fluency Among Bilingual University Students
Source: Research Square preprint supplement (doi:10.21203/rs.3.rs-6992595/v1), 2025-10-31
Supplement: Supplementary file 3 [file fd79b5b9bf61c2c0d22ff66d.docx]

**Appendix** **1**

**Academic Self-Determination Scale (ASDS)**

**Scale Instructions:**

Dear Student,

This scale has been developed to assess your level of academic self-determination. Please follow these guidelines:

- Enter your personal details in the space provided.
- Read each statement carefully, then shade the box in front of the response that best represents you, as shown in the example below:

- One of my family members reminds me of my academic assignments:
 Strongly agree  Agree  Sometimes  Disagree  Strongly disagree

- Mark only one response for each statement, as in the example above.
- Do not leave any item unanswered.
- Choose the response that best reflects you; any answer is considered correct as long as it represents you.
- Your responses on this scale will not affect your grades or academic performance evaluation.
- Begin answering the scale items when you are instructed to do so.

Personal Data

| Gender: …………………………………….…………………….. | Student Name: …………………………………………………….. |
| --- | --- |
| Date of Birth: ………………………………………………….. | University and College: ……………………………………… |
|  | Level/Section: **………………………………………………………..** |

**Dimension 1: Academic Autonomy**

**Score: ……………….**

| 1- | I prepare (or arrange) by myself the academic assignments that are required of me. | Strongly agree | agree | Sometimes | Disagree | Strongly |
| --- | --- | --- | --- | --- | --- | --- |
| 2- | I participate in my favorite scientific events, even if my colleagues choose not to attend them. | Strongly agree | agree | Sometimes | Disagree | Strongly |
| 3- | I turn to a colleague to inquire from the instructor about what I need to know. (R) | Strongly agree | agree | Sometimes | Disagree | Strongly |
| 4- | One of my parents (or someone else) chooses my academic major or the elective courses I will take. (R) | Strongly agree | agree | Sometimes | Disagree | Strongly |
| 5- | I attend public lectures and seminars that discuss topics of interest to me. | Strongly agree | agree | Sometimes | Disagree | Strongly |

**Dimension 2: Academic Self-Regulation**

**Score: ……………….**

| 1- | I set goals according to my abilities before carrying out my academic tasks | Strongly agree | agree | Sometimes | Disagree | Strongly |
| --- | --- | --- | --- | --- | --- | --- |
| 2- | I create a plan for the steps I will follow to complete my assignments. | Strongly agree | agree | Sometimes | Disagree | Strongly |
| 3- | My family members complain about my academic belongings scattered around my room or house. (R) | Strongly agree | agree | Sometimes | Disagree | Strongly |
| 4- | I review the required assignments to ensure they are correct. | Strongly agree | agree | Sometimes | Disagree | Strongly |
| 5- | I differentiate the various factors that may hinder me from completing my tasks. | Strongly agree | agree | Sometimes | Disagree | Strongly |

**Dimension 3: Academic Psychological Empowerment**

**Score: ……………….**

| 1- | My university studies are important to me. | Strongly agree | agree | Sometimes | Disagree | Strongly |
| --- | --- | --- | --- | --- | --- | --- |
| 2- | The assignments that I complete with my colleagues mean a great deal to me. | Strongly agree | agree | Sometimes | Disagree | Strongly |
| 3- | I complete my academic tasks efficiently. | Strongly agree | agree | Sometimes | Disagree | Strongly |
| 4- | The results of the laboratory activities that I conduct myself are correct and accurate. | Strongly agree | agree | Sometimes | Disagree | Strongly |
| 5- | I offer suggestions that improve my group's work in the lab. | Strongly agree | agree | Sometimes | Disagree | Strongly |
| 6 | My colleagues take my opinion into consideration when discussing a scientific topic. | Strongly agree | agree | Sometimes | Disagree | Strongly |

**Dimension 4: Academic Self-Realization**

**Score: ……………….**

| 1- | I recognize the scientific experiences that I have not yet been able to achieve. | Strongly agree | agree | Sometimes | Disagree | Strongly |
| --- | --- | --- | --- | --- | --- | --- |
| 2- | Over time, I discovered that my academic proposals stray from reality. (R) | Strongly agree | agree | Sometimes | Disagree | Strongly |
| 3- | I accept my abilities and capabilities as they are. | Strongly agree | agree | Sometimes | Disagree | Strongly |
| 4- | I rise above my classmates' mistakes towards me. | Strongly agree | agree | Sometimes | Disagree | Strongly |
| 5- | My colleagues describe me as spontaneous in my behavior. | Strongly agree | agree | Sometimes | Disagree | Strongly |
| 6 | I hesitate to present the lectures I have to my colleagues. (R) | Strongly agree | agree | Sometimes | Disagree | Strongly |
