# Supplementary material for: Marzano's Self-System Thinking and a Four-Factor Model of Academic Self-Determination as Predictors of Persistence in Natural Sciences and Scientific Text Reading Fluency Among Bilingual University Students
Source: Research Square preprint supplement (doi:10.21203/rs.3.rs-6992595/v1), 2025-10-31
Supplement: Supplementary file 4 [file fee1ede8f80703e35e70f95b.docx]

**Appendix 2**

**Self-System Thinking Scale**

**Scale Instructions:**

Dear Student,

This scale has been prepared to assess the level of your self-system thinking. Please take the following into consideration:

- Enter your personal details in the space provided.
- Read each statement carefully, then shade the box in front of the response that best represents you, as shown in the example below:

- I feel that achieving a satisfactory grade in my major courses might be difficult:
 Strongly agree  Agree  Sometimes  Disagree  Strongly disagree

- Mark only one response for each statement, as in the example above.
- Do not leave any item unanswered.
- Choose the response that best reflects you; any answer is considered correct as long as it represents you.
- Your responses on this scale will not affect your grades or academic performance evaluation.
- Begin answering the scale items when you are instructed to do so.

Personal Data

| Gender: …………………………………….…………………….. | Student Name: …………………………………………………….. |
| --- | --- |
| Date of Birth: ………………………………………………….. | University and College: ……………………………………… |
|  | Level/Section: **………………………………………………………..** |

**Dimension 1: Examining Importance**

**Score: ……………….**

| 1- | I am astonished by colleagues who do not seem to take participating in lab experiments seriously, no matter how important they are. | Strongly agree | agree | Sometimes | Disagree | Strongly |
| --- | --- | --- | --- | --- | --- | --- |
| 2- | I believe that studying scientific courses in branches of the natural sciences outside my specialized field benefits me in becoming a successful teacher. | Strongly agree | agree | Sometimes | Disagree | Strongly |
| 3- | I believe that studying the chemistry lab will help me familiarize myself with the tools and chemicals. | Strongly agree | agree | Sometimes | Disagree | Strongly |
| 4- | I believe that I am right in my conviction about the importance of studying contemporary scientific topics in my field of specialization. | Strongly agree | agree | Sometimes | Disagree | Strongly |
| 5- | I consider that studying applied verbal problems related to certain scientific phenomena is unnecessary. (R) | Strongly agree | agree | Sometimes | Disagree | Strongly |
| 6- | I believe that studying laboratories in other branches of natural sciences outside of my specialization is a waste of effort and time. (R) | Strongly agree | agree | Sometimes | Disagree | Strongly |

**Dimension 2: Examining Efficacy.**

**Score: ……………….**

| 1- | I believe that my ability to read scientific subjects in my field in English may not improve. (R) | Strongly agree | agree | Sometimes | Disagree | Strongly |
| --- | --- | --- | --- | --- | --- | --- |
| 2- | I believe that I will solve complex scientific problems and issues that will be asked of me during my studies more effectively than before. | Strongly agree | agree | Sometimes | Disagree | Strongly |
| 3- | I anticipate difficulty in achieving a satisfactory level in studying the theoretical courses of my scientific specialization that involve long explanations in English. (R) | Strongly agree | agree | Sometimes | Disagree | Strongly |
| 4- | I believe that I will find it difficult to understand the diagrams and graphs included in the scientific topics I will study. (R) | Strongly agree | agree | Sometimes | Disagree | Strongly |
| 5- | I view the scientific topics that my seniors complain about due to their difficulty as a challenge for me rather than a threat. | Strongly agree | agree | Sometimes | Disagree | Strongly |
| 6- | I believe that I am capable of achieving the objectives of the laboratory activities that I am required to study. | Strongly agree | agree | Sometimes | Disagree | Strongly |
| 7- | It occurs to me that there are subjects in which, no matter how much effort I put in, I will never reach an acceptable level. (R) | Strongly agree | agree | Sometimes | Disagree | Strongly |
| 8- | I expect to perform well in the upcoming exams for the specialized courses I am studying. | Strongly agree | agree | Sometimes | Disagree | Strongly |

**Dimension 3: Examining Emotional Response.**

**Score: ……………….**

| 1- | I look forward to the announcement of the lecture and lab schedules at the beginning of the semester. | Strongly agree | agree | Sometimes | Disagree | Strongly |
| --- | --- | --- | --- | --- | --- | --- |
| 2- | I feel distressed when I anticipate that the instructor will ask me to read a scientific text during the lecture. (R) | Strongly agree | agree | Sometimes | Disagree | Strongly |
| 3- | I look forward to engaging in the laboratory activities that I am assigned. | Strongly agree | agree | Sometimes | Disagree | Strongly |
| 4- | I believe that I am likely to enjoy participating in the tasks of studying my upcoming specialized scientific courses. | Strongly agree | agree | Sometimes | Disagree | Strongly |
| 5- | I hope that the instructor will not be absent from delivering the lectures for my specialized scientific courses. | Strongly agree | agree | Sometimes | Disagree | Strongly |
| 6 | Thinking about preparing to study the topics of my specialized course makes me feel at ease. | Strongly agree | agree | Sometimes | Disagree | Strongly |
| 7- | I become passionate when I know that contemporary applied scientific topics will be included in one of my specialized scientific courses, due to my curiosity to learn more about them. | Strongly agree | agree | Sometimes | Disagree | Strongly |
| 8- | I feel happiness when thinking about planning to contribute ideas in discussions of the scientific topics I will study. | Strongly agree | agree | Sometimes | Disagree | Strongly |
